# Supplementary material for: The Gut Microbiota during a Behavioral Weight Loss Intervention
Source: MDPI journal article supplement (doi:10.3390/nu13093248), 2021-09-18

## **Supplementary Material**

**Table S1. Clinical characteristics of study cohort by intervention group.** There were no significant differences in clinical characteristics between the intervention groups at baseline.

|                                 | Overall      | DCR          | IMF           | p-value |
|---------------------------------|--------------|--------------|---------------|---------|
| N                               | 56           | 25           | 31            |         |
| Weight (kgs)                    | 94.4 (16.0)  | 94.4 (17.0)  | 94.3 (15.5)   | 0.995   |
| BMI                             | 33.1 (4.4)   | 32.9 (4.7)   | 33.2 (4.1)    | 0.803   |
| Waist circumference             | 108.5 (10.8) | 109.5 (11.5) | 107.6 (10.3)  | 0.519   |
| Metabolic Syndrome Score        | 2.3 (1.0)    | 2.2 (1.1)    | 2.4 (1.0)     | 0.516   |
| Metabolic Syndrome              | 21 (37.5)    | 9 (36.0)     | 12 (38.7)     | >0.99   |
| Triglycerides (mg/dL)           | 146.1 (89.0) | 129.0 (64.5) | 160.0 (103.6) | 0.198   |
| Glucose (mg/dL)                 | 93.6 (9.8)   | 92.3 (10.3)  | 94.7 (9.4)    | 0.363   |
| Diastolic blood pressure (mmHg) | 74.2 (8.3)   | 73.8 (9.5)   | 74.6 (7.3)    | 0.694   |
| Systolic blood pressure (mmHg)  | 118.1 (14.0) | 115.5 (14.5) | 120.2 (13.4)  | 0.218   |
| HDL (mg/dL)                     | 49.9 (13.5)  | 48.7 (12.6)  | 50.9 (14.3)   | 0.552   |

**Table S2. Association between baseline and change in participant gut microbiota composition and two clinical outcome measures, percent change in weight and in waist circumference.** The table shows p-values from Microbiome-based Kernel Association Tests (MiRKAT) using kernels based on the weighted and unweighted UniFrac metrics in the overall cohort, as well as stratified by intervention group.

DCR: Daily caloric restriction; IMF: intermittent fasting

| Time                          | Participants | UniFrac Metric | Clinical Outcome    |                                  |
|-------------------------------|--------------|----------------|---------------------|----------------------------------|
|                               |              |                | $\Delta$ Weight (%) | $\Delta$ Waist circumference (%) |
| Baseline                      | All          | Weighted       | 0.277               | <b>0.011</b>                     |
|                               |              | Unweighted     | 0.586               | 0.740                            |
|                               | DCR          | Weighted       | 0.065               | 0.495                            |
|                               |              | Unweighted     | 0.828               | 0.808                            |
|                               | IMF          | Weighted       | 0.299               | <b>0.028</b>                     |
|                               |              | Unweighted     | 0.473               | 0.830                            |
| Change (baseline to 3 months) | All          | Weighted       | 0.481               | <b>0.009</b>                     |
|                               |              | Unweighted     | 0.844               | 0.645                            |
|                               | DCR          | Weighted       | 0.931               | 0.449                            |
|                               |              | Unweighted     | 0.815               | 0.285                            |
|                               | IMF          | Weighted       | 0.208               | <b>0.030</b>                     |
|                               |              | Unweighted     | 0.879               | 0.913                            |

**Table S3. Association between participant gut microbiota alpha-diversity and outcome measures.**

- A) This table shows the results of longitudinal linear mixed models of weight and waist circumference based on 4 indices of alpha-diversity: Observed OTUs, Evenness, Shannon diversity index, and Faith's Phylogenetic Diversity. These indices reflect different aspects of diversity, such as the richness, evenness, and phylogenetic relatedness of the organisms detected in the samples.
- B) This table shows the results of linear regressions models of percent change in weight and waist circumference based on baseline indices of alpha-diversity.

DCR: Daily caloric restriction; IMF: intermittent fasting; OTUs: operational taxonomic units (clusters of organisms that are grouped by gene sequence similarity); PD: Phylogenetic Diversity.

A)

| Outcome                  | Longitudinal Measure | Estimate | Lower CI | Upper CI | p-value |
|--------------------------|----------------------|----------|----------|----------|---------|
| Weight (kg)              | Observed OTUs        | -0.01    | -0.03    | 0.00     | 0.179   |
|                          | Evenness             | -3.12    | -16.96   | 10.83    | 0.665   |
|                          | Shannon              | -0.74    | -1.99    | 0.51     | 0.254   |
|                          | Faith's PD           | -0.04    | -0.10    | 0.02     | 0.176   |
| Waist circumference (cm) | Observed OTUs        | -0.01    | -0.03    | 0.02     | 0.516   |
|                          | Evenness             | -10.48   | -29.73   | 8.97     | 0.297   |
|                          | Shannon              | -1.02    | -2.76    | 0.74     | 0.261   |
|                          | Faith's PD           | -0.02    | -0.11    | 0.06     | 0.574   |

B)

| Outcome                           | Baseline Measure | Estimate | Lower CI | Upper CI | p-value |
|-----------------------------------|------------------|----------|----------|----------|---------|
| Change in weight (%)              | Observed OTUs    | 0.00     | -0.0001  | 0.0003   | 0.352   |
|                                   | Evenness         | 0.07     | -0.08    | 0.22     | 0.348   |
|                                   | Shannon          | 0.01     | -0.01    | 0.02     | 0.296   |
|                                   | Faith's PD       | 0.0004   | -0.0004  | 0.001    | 0.296   |
| Change in waist circumference (%) | Observed OTUs    | 0.0001   | -0.0002  | 0.0004   | 0.675   |
|                                   | Evenness         | 0.12     | -0.08    | 0.32     | 0.233   |
|                                   | Shannon          | 0.01     | -0.01    | 0.03     | 0.309   |
|                                   | Faith's PD       | 0.0002   | -0.0008  | 0.001    | 0.656   |

**Table S4. Performance metrics of random forests to predict percent change in weight and in waist circumference using all taxa and those selected as most highly predictive of these outcomes by VSURF.**

This table shows the model performance metrics ( $R^2$ , or the percent of the variation explained in the outcome; mean absolute error [MAE]; and root mean squared error [RMSE]) of random forests predicting the clinical outcomes based on baseline abundance of gut microbiota taxa and on change in taxa from baseline to 3 months. These results are from 3-fold cross validation of 100 repetitions.

| Outcome                          | Time                          | Model                                 | $R^2$ (%)           | MAE (%)          | RMSE             |
|----------------------------------|-------------------------------|---------------------------------------|---------------------|------------------|------------------|
| $\Delta$ Weight (%)              | Baseline                      | Random Forests of all taxa            | 2.02 (0.66-5.04)    | 2.99 (2.78-3.21) | 3.66 (3.32-4.06) |
|                                  |                               | Random Forests of VSURF selected taxa | 29.36 (20.63-40.78) | 2.46 (2.2-2.74)  | 3.16 (2.79-3.52) |
|                                  | Change (baseline to 3 months) | Random Forests of all taxa            | 2.31 (0.59-7.33)    | 3.09 (2.92-3.31) | 3.78 (3.46-4.15) |
|                                  |                               | Random Forests of VSURF selected taxa | 21.31 (12.39-31.85) | 2.7 (2.43-2.98)  | 3.38 (3.04-3.81) |
| $\Delta$ Waist circumference (%) | Baseline                      | Random Forests of all taxa            | 3.82 (0.73-10.11)   | 3.64 (3.35-3.94) | 4.78 (4.35-5.28) |
|                                  |                               | Random Forests of VSURF selected taxa | 21.25 (10.43-33.48) | 3.53 (3.19-3.85) | 4.39 (3.97-4.81) |
|                                  | Change (baseline to 3 months) | Random Forests of all taxa            | 14.56 (6.93-24.54)  | 3.61 (3.28-3.87) | 4.8 (4.38-5.16)  |
|                                  |                               | Random Forests of VSURF selected taxa | 37.97 (23.51-48.39) | 3.32 (3.02-3.55) | 4.08 (3.77-4.47) |

**Table S5. Regression models of the change in alpha-diversity as a function of change in weight or waist circumference, change in dietary intake and change in physical activity.**

| Model             | N  | Outcome             | Alpha Diversity  | Covariate (change in measure) | Estimate | Lower CI | Upper CI | P-value |
|-------------------|----|---------------------|------------------|-------------------------------|----------|----------|----------|---------|
| Dietary           | 45 | Weight              | Evenness         | Weight                        | -0.12    | -0.82    | 0.58     | 0.73    |
|                   |    |                     |                  | Kilocalories                  | 0.000002 | -0.0001  | 0.0001   | 0.95    |
|                   |    |                     |                  | % Protein                     | 0.0012   | -0.01    | 0.009    | 0.75    |
|                   |    |                     |                  | % Fat                         | 0.0009   | -0.005   | 0.007    | 0.77    |
|                   |    |                     | Shannon          | % Carbohydrates               | -0.0008  | -0.007   | 0.005    | 0.79    |
|                   |    |                     |                  | Weight                        | -1.53    | -9.18    | 6.12     | 0.69    |
|                   |    |                     |                  | Kilocalories                  | 0.0002   | -0.001   | 0.001    | 0.61    |
|                   |    |                     |                  | % Protein                     | 0.030    | -0.05    | 0.11     | 0.46    |
|                   |    |                     |                  | % Fat                         | 0.01     | -0.05    | 0.08     | 0.67    |
|                   |    |                     | Faith's PD       | % Carbohydrates               | 0.017    | -0.05    | 0.08     | 0.60    |
|                   |    |                     |                  | Weight                        | -21.02   | -183.46  | 141.42   | 0.79    |
|                   |    |                     |                  | Kilocalories                  | 0.00     | -0.01    | 0.02     | 0.55    |
|                   |    |                     |                  | % Protein                     | 0.43     | -1.32    | 2.19     | 0.62    |
|                   |    |                     |                  | % Fat                         | 0.11     | -1.32    | 1.54     | 0.87    |
|                   |    |                     | Observed Species | % Carbohydrates               | 0.77     | -0.62    | 2.17     | 0.27    |
|                   |    |                     |                  | Weight                        | -63.62   | -654.22  | 526.97   | 0.83    |
|                   |    |                     |                  | Kilocalories                  | 0.02     | -0.05    | 0.08     | 0.61    |
|                   |    |                     |                  | % Protein                     | 1.93     | -4.45    | 8.32     | 0.54    |
|                   |    |                     |                  | % Fat                         | 0.93     | -4.26    | 6.12     | 0.72    |
|                   |    |                     |                  | % Carbohydrates               | 3.09     | -1.97    | 8.16     | 0.22    |
|                   |    | Waist circumference | Evenness         | Waist circumference           | -0.11    | -0.71    | 0.48     | 0.70    |
|                   |    |                     |                  | Kilocalories                  | 0.000003 | -0.00007 | 0.0001   | 0.93    |
|                   |    |                     |                  | % Protein                     | 0.001    | -0.01    | 0.009    | 0.79    |
|                   |    |                     |                  | % Fat                         | 0.001    | -0.005   | 0.007    | 0.78    |
|                   |    |                     | Shannon          | % Carbohydrates               | -0.0006  | -0.007   | 0.005    | 0.85    |
|                   |    |                     |                  | Waist circumference           | -1.61    | -8.06    | 4.83     | 0.61    |
|                   |    |                     |                  | Kilocalories                  | 0.0002   | -0.001   | 0.001    | 0.59    |
|                   |    |                     |                  | % Protein                     | 0.03     | -0.06    | 0.11     | 0.50    |
|                   |    |                     |                  | % Fat                         | 0.014    | -0.05    | 0.08     | 0.68    |
|                   |    |                     | Faith's PD       | % Carbohydrates               | 0.020    | -0.04    | 0.08     | 0.53    |
|                   |    |                     |                  | Waist circumference           | -37.80   | -174.40  | 98.80    | 0.58    |
|                   |    |                     |                  | Kilocalories                  | 0.01     | -0.01    | 0.02     | 0.53    |
|                   |    |                     |                  | % Protein                     | 0.34     | -1.44    | 2.13     | 0.70    |
|                   |    |                     |                  | % Fat                         | 0.11     | -1.31    | 1.54     | 0.87    |
|                   |    |                     | Observed Species | % Carbohydrates               | 0.82     | -0.55    | 2.19     | 0.23    |
|                   |    |                     |                  | Waist circumference           | -88.98   | -586.74  | 408.78   | 0.72    |
|                   |    |                     |                  | Kilocalories                  | 0.02     | -0.04    | 0.08     | 0.59    |
|                   |    |                     |                  | % Protein                     | 1.75     | -4.75    | 8.25     | 0.59    |
|                   |    |                     |                  | % Fat                         | 0.93     | -4.25    | 6.11     | 0.72    |
|                   |    |                     |                  | % Carbohydrates               | 3.22     | -1.77    | 8.21     | 0.20    |
| Physical Activity | 47 | Weight              | Evenness         | Weight                        | -0.07    | -0.74    | 0.60     | 0.83    |
|                   |    |                     |                  | Stepping time                 | 0.0005   | -0.001   | 0.002    | 0.51    |
|                   |    |                     |                  | Sitting time                  | 0.000005 | -0.0002  | 0.0002   | 0.96    |
|                   |    |                     | Shannon          | Weight                        | -2.39    | -9.70    | 4.91     | 0.51    |
|                   |    |                     |                  | Stepping time                 | 0.00     | -0.01    | 0.02     | 0.61    |
|                   |    |                     |                  | Sitting time                  | -0.0008  | -0.003   | 0.001    | 0.46    |
|                   |    |                     | Faith's PD       | Weight                        | -55.23   | -212.65  | 102.19   | 0.48    |
|                   |    |                     |                  | Stepping time                 | 0.06     | -0.27    | 0.39     | 0.72    |
|                   |    |                     |                  | Sitting time                  | -0.03    | -0.08    | 0.02     | 0.20    |
|                   |    |                     | Observed Species | Weight                        | -199.08  | -758.70  | 360.53   | 0.48    |
|                   |    |                     |                  | Stepping time                 | 0.22     | -0.95    | 1.40     | 0.70    |
|                   |    |                     |                  | Sitting time                  | -0.13    | -0.30    | 0.04     | 0.12    |
|                   |    | Waist circumference | Evenness         | Waist circumference           | -0.08    | -0.60    | 0.44     | 0.77    |
|                   |    |                     |                  | Stepping time                 | 0.0005   | -0.001   | 0.002    | 0.49    |
|                   |    |                     |                  | Sitting time                  | 0.000004 | -0.0002  | 0.0002   | 0.97    |
|                   |    |                     | Shannon          | Waist circumference           | -1.00    | -6.69    | 4.69     | 0.72    |
|                   |    |                     |                  | Stepping time                 | 0.00     | -0.01    | 0.02     | 0.52    |
|                   |    |                     |                  | Sitting time                  | -0.0008  | 0.00     | 0.00     | 0.48    |
|                   |    |                     | Faith's PD       | Waist circumference           | -14.76   | -137.61  | 108.09   | 0.81    |
|                   |    |                     |                  | Stepping time                 | 0.09     | -0.24    | 0.41     | 0.60    |
|                   |    |                     |                  | Sitting time                  | -0.03    | -0.08    | 0.02     | 0.23    |
|                   |    |                     | Observed Species | Waist circumference           | -43.16   | -480.05  | 393.74   | 0.84    |
|                   |    |                     |                  | Stepping time                 | 0.32     | -0.83    | 1.48     | 0.57    |
|                   |    |                     |                  | Sitting time                  | -0.13    | -0.29    | 0.04     | 0.14    |

**Table S6. Association between baseline and change in participant gut microbiota composition and two clinical outcome measures, percent change in weight and in waist circumference, controlling for change in dietary intake and physical activity.** The table shows p-values from Microbiome-based Kernel Association Tests (MiRKAT) using kernels based on the weighted and unweighted UniFrac metrics in the overall cohort.

| Time                          | Model                                                                                                                        | UniFrac Metric | Clinical Outcome |                           |
|-------------------------------|------------------------------------------------------------------------------------------------------------------------------|----------------|------------------|---------------------------|
|                               |                                                                                                                              |                | Δ Weight (%)     | Δ Waist circumference (%) |
| Baseline                      | Controlling for diet, age and sex (N=54)<br>Caloric intake, % carbohydrates / protein / fat                                  | Weighted       | 0.401            | <b>0.011</b>              |
|                               |                                                                                                                              | Unweighted     | 0.342            | 0.160                     |
| Change (baseline to 3 months) | Controlling for change in diet, age, sex and group (N=45)<br>Change in: caloric intake, % carbohydrates / protein / fat      | Weighted       | 0.792            | <b>0.023</b>              |
|                               |                                                                                                                              | Unweighted     | 0.923            | 0.455                     |
| Baseline                      | Controlling for diet, physical activity, age and sex (N=55)<br>≥75 cadence stepping time, sitting time                       | Weighted       | 0.306            | <b>0.002</b>              |
|                               |                                                                                                                              | Unweighted     | 0.775            | 0.558                     |
| Change (baseline to 3 months) | Controlling for change in physical activity, age, sex and group (N=47)<br>Change in: ≥75 cadence stepping time, sitting time | Weighted       | 0.557            | <b>0.027</b>              |
|                               |                                                                                                                              | Unweighted     | 0.980            | 0.575                     |

**Figure S1. Change in diet and physical activity of DRIFT2 participants from baseline to 3 months and the association with change in the gut microbiota community structure (beta-diversity).**

- (A) During the first three months of the intervention, participants decreased dietary energy intake and percentage intake from fat, and they increased percentage intake from protein.
- (B) The gut microbiota may contribute towards weight loss, but it also may change in response to weight loss. We used permutational ANOVA to quantify predictors of the change from baseline to 3 months in gut microbiota beta diversity (weighted and unweighted UniFrac). The plots show predictors on the y-axes and R<sup>2</sup> values (amount of variation explained in the change in gut microbiota beta diversity) on the x-axes. This plot shows results of models including change in weight, as well change in diet (upper plots; kilocalories and percentages of macronutrients) and change in physical activity (lower plots; >75 cadence stepping time and sitting time). Sex, age and intervention group were included as control variables. The color indicates the statistical significance as indicated in the legend.
- (C) This plot is similar to B, but includes change in waist circumference rather than weight.

A

|                                                  | Baseline       | 3 months       | Change         | P-value |
|--------------------------------------------------|----------------|----------------|----------------|---------|
| <b>Dietary Intake N</b>                          | 54             | 48             | 45             |         |
| Dietary energy intake                            | 1714.0 (333.2) | 1275.8 (387.4) | -469.6 (435.3) | <0.001  |
| % Fat                                            | 38.5 (6.5)     | 34.9 (5.8)     | -3.8 (6.2)     | <0.001  |
| % Protein                                        | 17.5 (3.6)     | 21.2 (4.6)     | 3.7 (4.9)      | <0.001  |
| % Carbohydrates                                  | 41.6 (7.6)     | 41.5 (7.1)     | -0.1 (6.2)     | 0.9     |
| <b>Physical Activity N</b>                       | 55             | 50             | 47             |         |
| Stepping time at cadence ≥75 steps/min (min/day) | 49.7 (17.0)    | 62.2 (25.0)    | 12.6 (19.5)    | <0.001  |
| Sitting time (min/day)                           | 550.1 (92.6)   | 518.4 (106.7)  | -31.1 (124.6)  | 0.09    |

B

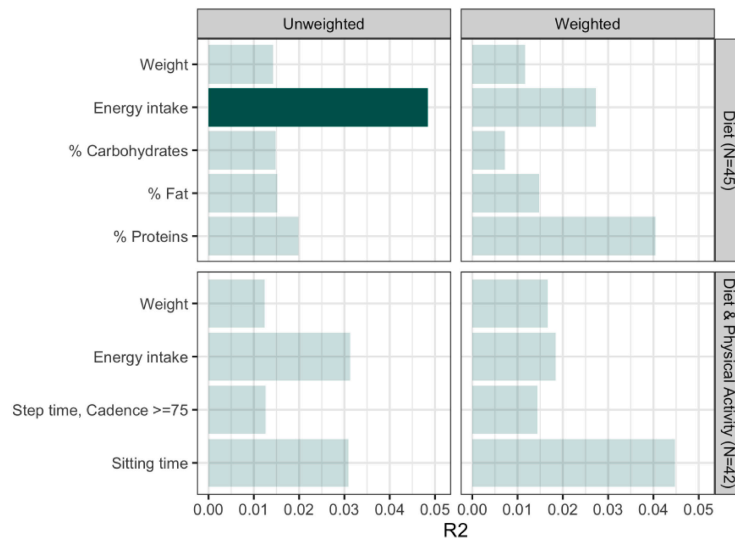

C

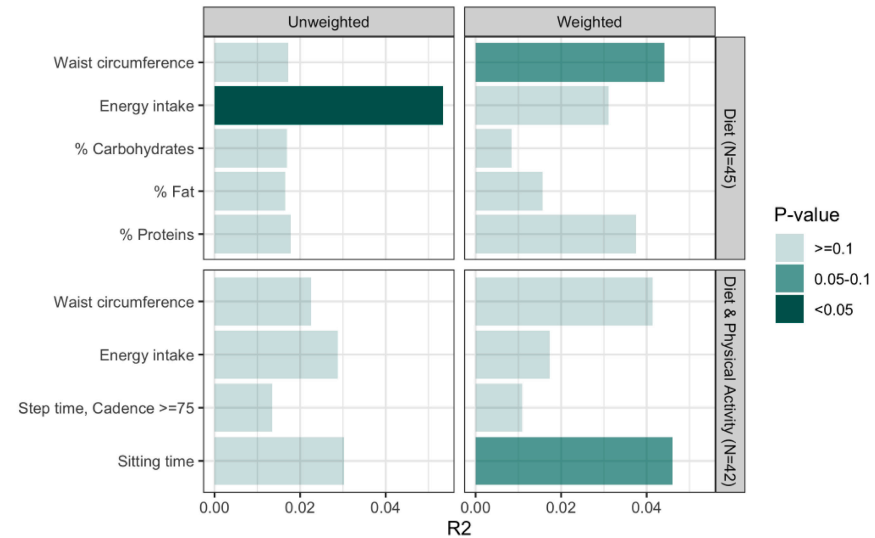



### Figure S2. Changes in the gut microbiota taxa of DRIFT2 participants from baseline to 3 months by intervention group assignment.

The overall gut microbiota composition of study participants changed significantly from baseline to 3 months, but there was not a statistically significant interaction between time and intervention group, suggesting that the changes in the overall gut microbiota composition were comparable for DCR and IMF.

(A) Average relative abundance of the most prevalent gut microbiota phyla among DCR and IMF at baseline and 3 months. This plot shows comparable shifts over time in the predominant phyla among the two intervention groups.

(B) Average relative abundance of the most prevalent gut microbiota genera among DCR and IMF at baseline and 3 months. As seen at the phylum-level, the intervention groups showed comparable shifts in genera. The one statistically significant exception was the genus *Akkermansia* (see Figure 5).

DCR: Daily caloric restriction; IMF: intermittent fasting

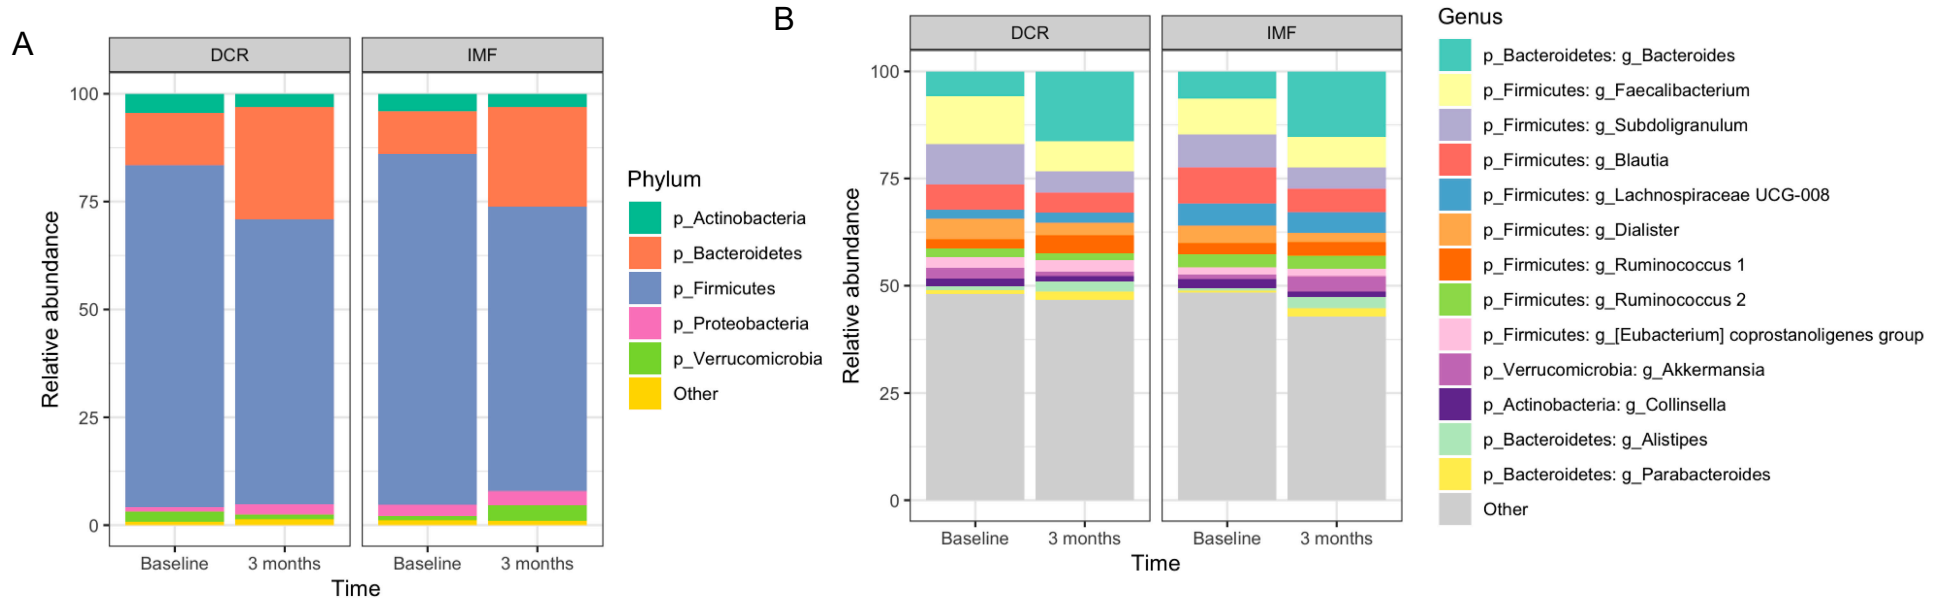

Supplement: s1 [file s1]
